# Supplementary material
Source: HighWire-hosted journal article supplement (https://jitc.bmj.com/content/9/7/e002840)
Supplement: inline-supplementary-material-1 [file inline-supplementary-material-1.pdf]

## Supplementary Materials for

### Tryptophan potentiates CD8<sup>+</sup> T cells against cancer cells by TRIP12 tryptophanylation and surface PD-1 downregulation

Rui Qin,<sup>1</sup> Chen Zhao,<sup>1</sup> Chen-Ji Wang,<sup>1</sup> Wei Xu,<sup>2,3</sup> Jian-Yuan Zhao,<sup>2,3</sup> Yan Lin,<sup>2,3</sup> Yi-Yuan  
Yuan,<sup>2,3</sup> Peng-Cheng Lin,<sup>4</sup> Yao Li,<sup>1,\*</sup> Shi-Min Zhao,<sup>1,2,\*</sup> and Yan Huang<sup>1,\*</sup>.

Correspondence to: Yao Li (yaoli@fudan.edu.cn) or Shi-Min Zhao (zhaosm@fudan.edu.cn) or  
Yan Huang (huangyan@fudan.edu.cn)

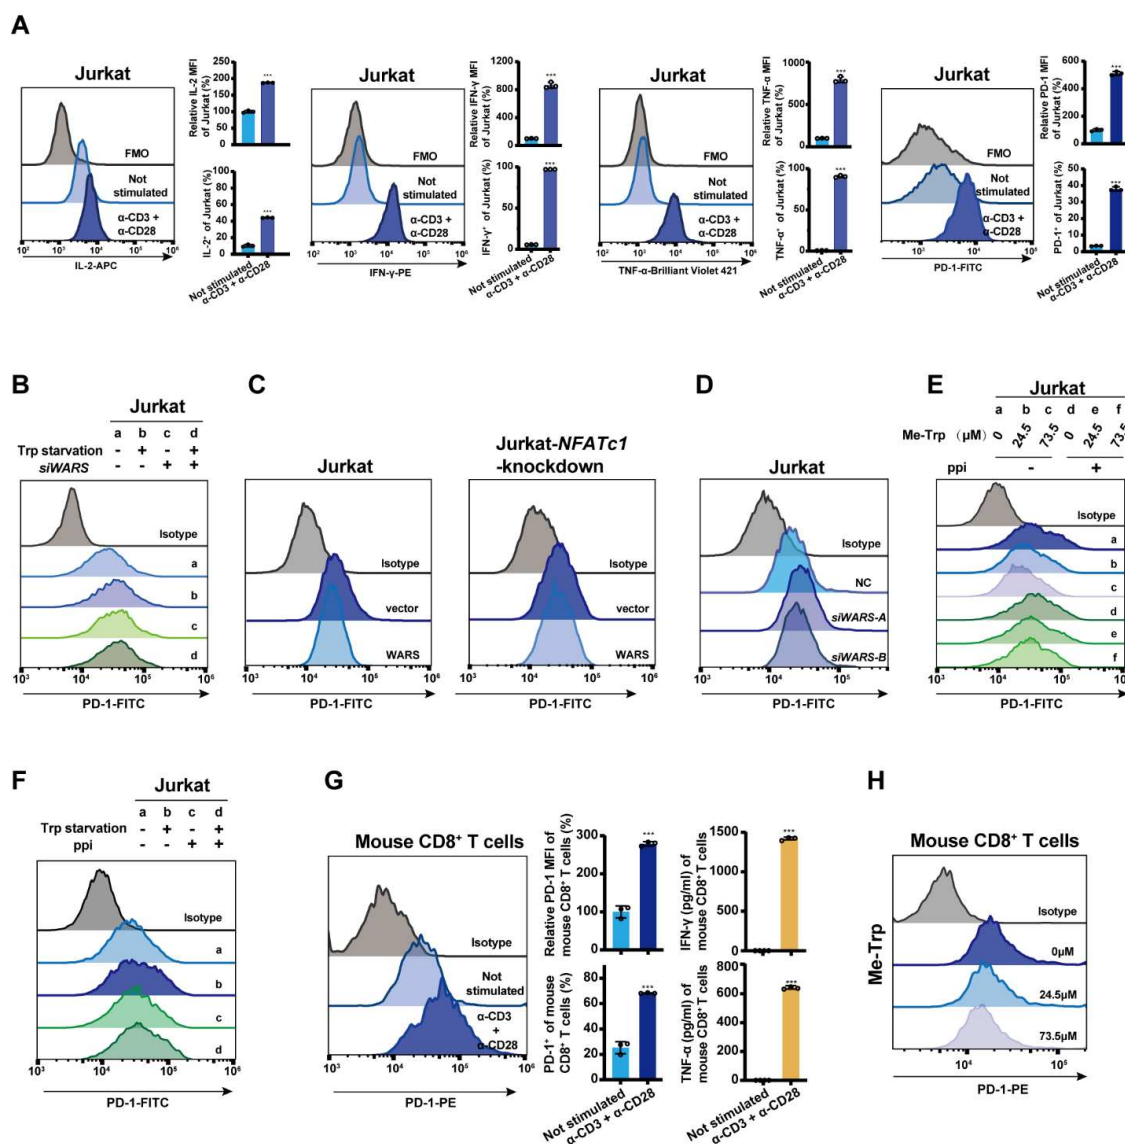**Figure. S1.*****Tryptophan WARS-dependently downregulates PD-1 expression***

**S1A, anti-CD3 and anti-CD28 activated Jurkat T cells.** Jurkat T cells were treated by anti-CD3 (5 μg/ml) and anti-CD28 (2.5 μg/ml) antibodies. The intracellular staining of IL-2, IFN-γ and TNF-α, cell surface PD-1 levels and percentage of positive cells were assessed to confirm the successful activation. n = 3, mean ± SD (herein after for all statistics in supplemental figures unless indicated otherwise).

**S1B, knockdown WARS abrogated cell surface PD-1-regulation by Me-Trp.** Representative flow cytometry results of Figure 1D.

**S1C-S1D, Silencing NFATc1 diminished WARS ability to alter cell surface PD-1.**

Representative flow cytometry results of Figure 1E and 1F.

**S1E-S1F, Pyrophosphate inhibited Me-Trp supplemental and tryptophan-starvation to alter PD-1.** Representative flow cytometry results of Figure 1G and 1H.

**S1G, anti-CD3 and anti-CD28 activated mouse naïve CD8<sup>+</sup> T cells.** Mouse naïve CD8<sup>+</sup> T cells were treated by anti-CD3 (5 µg/ml) and anti-CD28 (5 µg/ml) antibodies. Secretion of IFN-γ and TNF-α were detected by ELISA and cell surface PD-1 levels were measured by flow cytometry to confirm the successful activation. Percentage of PD-1 positive cells and PD-1 MFI were assessed.

**S1H, Me-Trp administration decreased mouse CD8<sup>+</sup> T cells surface PD-1.** Representative flow cytometry results of Figure 1I.

\*P < 0.05, \*\*P < 0.01, \*\*\*P < 0.001, two-tailed Student's t-test. (herein after)

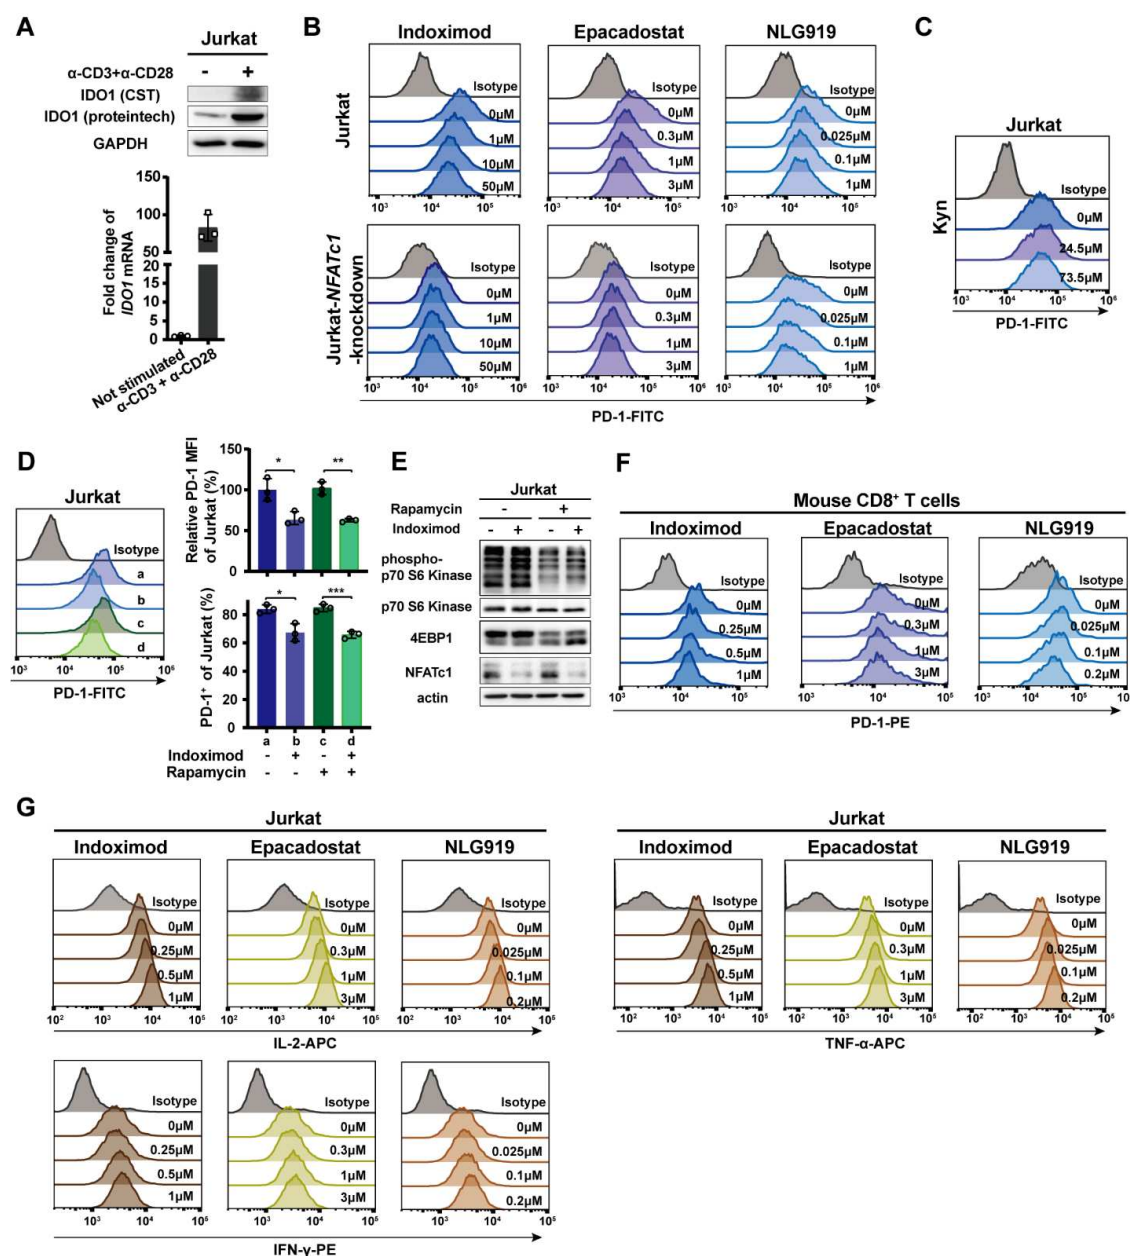**Figure. S2.***IDO inhibitors decreases PD-1 through accumulating intracellular tryptophan*

**S2A, Activated Jurkat cells had enhanced IDO1 expression.** Jurkat cells and Anti-CD3 (5  $\mu$ g/ml) and anti-CD28 (2.5  $\mu$ g/ml) antibodies co-stimulated Jurkat T cells were analyzed for IDO1 protein with two antibodies (upper) and mRNA (lower) levels.

**S2B, NFATc1 knockdown prevented IDO inhibitors to decrease PD-1.** Representative flow cytometry results of Figure 2B.

**S2C, Kynurenine had negligible effects on surface PD-1 expression.** Representative flow cytometry results of Figure 2C.

**S2D, Indoximod regulates PD-1 in the presence of rapamycin in Jurkat cells.** The expression of PD-1 were detected in stimulated Jurkat T cells that were cultured in media supplemented with Indoximod under absence or presence of rapamycin. n = 3, mean  $\pm$  SD.

**S2E, Indoximod regulates NFATc1 in the presence of rapamycin in Jurkat cells.** The expression of NFATc1 were detected in stimulated Jurkat T cells that were cultured in media supplemented with Indoximod under absence or presence of rapamycin.

**S2F, IDO inhibitors decreased PD-1 in mouse CD8<sup>+</sup> T cells.** Representative flow cytometry results of Figure 2D.

**S2G, IDO inhibitors increased IL-2, IFN- $\gamma$  and TNF- $\alpha$  level in T cells.** Representative flow cytometry results of Figure 2E.

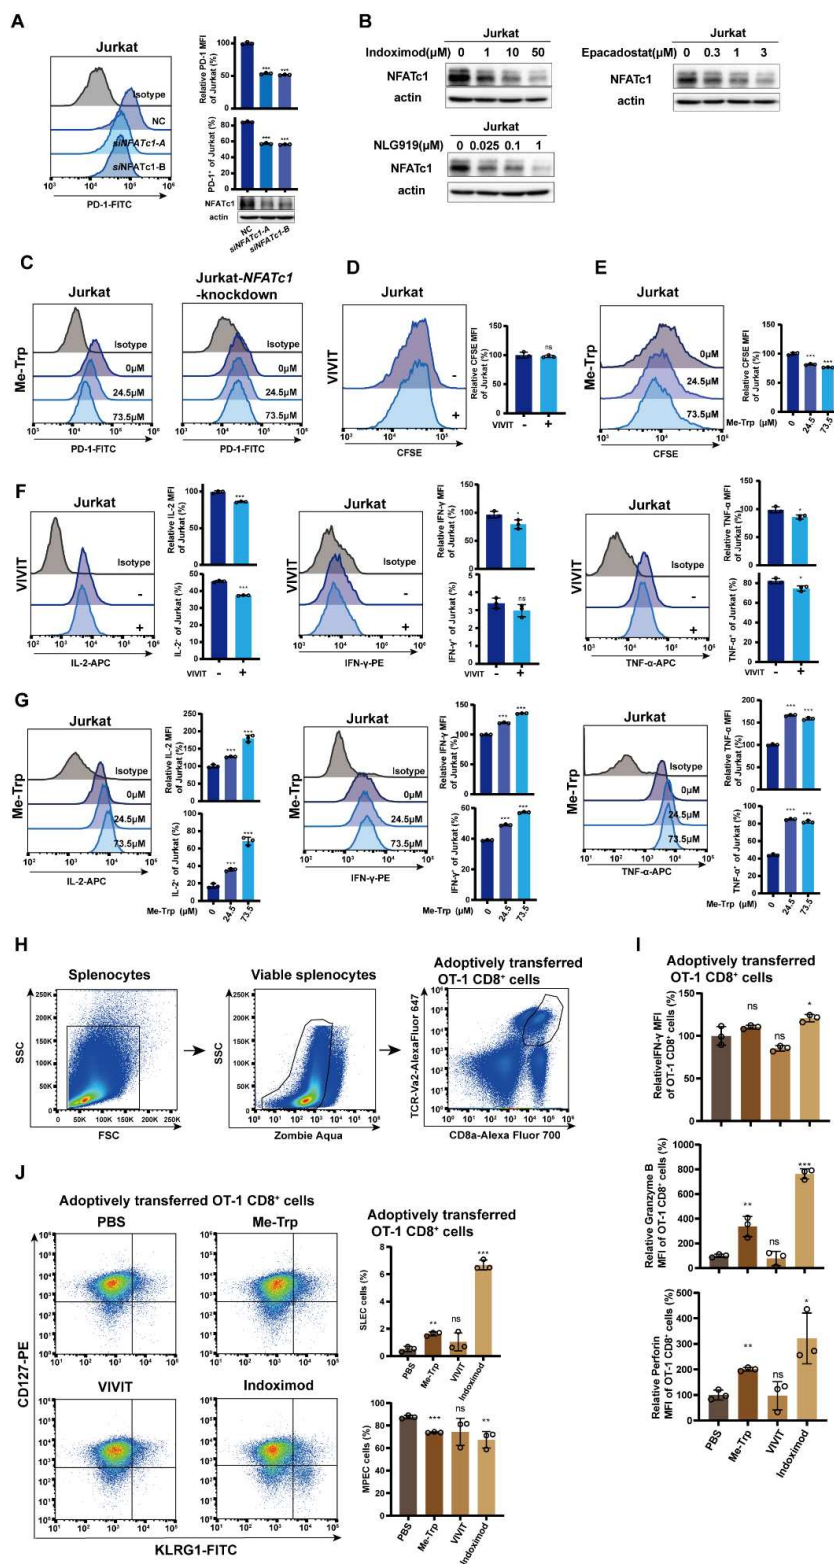

**Figure. S3.*****Tryptophan and WARS downregulates PD-1 transcription factor NFATc1***

**S3A, Knockdown *NFATc1* results in decreased levels of PD-1.** The MFI and PD-1 positive cells were determined in both Jurkat T cells and in *NFATc1* knockdown Jurkat T cells. n = 3, mean  $\pm$  SD.

**S3B, IDO inhibitors decrease NFATc1.** The protein levels of NFATc1 were examined in Jurkat cells that were treated with IDO inhibitors (indoximod, epacadostat and NLG919 analogue).

**S3C, NFATc1 knockdown abrogated Me-Trp to decrease the cell surface PD-1.**

Representative flow cytometry results of Figure 3J.

**S3D-S3E, VIVIT peptide and Me-Trp effects on proliferation of Jurkat cells.** The proliferation of Jurkat cells were measured under absence and presence of VIVIT peptide (15 $\mu$ M, 24h) (S3D) or Me-Trp (S3E). n = 3, mean  $\pm$  SD.

**S3F, VIVIT peptide decreased cytokine levels.** The IL-2, IFN- $\gamma$  and TNF- $\alpha$  levels were detected in stimulated Jurkat T cells, VIVIT peptide-treated Jurkat T cells by flow cytometry. n = 3, mean  $\pm$  SD.

**S3G, Trp supplementation increased cytokine levels.** The IL-2, IFN- $\gamma$  and TNF- $\alpha$  levels were detected in stimulated Jurkat T cells, Trp-treated Jurkat T cells by flow cytometry. n = 3, mean  $\pm$  SD.

**S3H, Sorting OT-1 CD8<sup>+</sup> T cells from adoptively transferred C57BL/6 mice.** CD8<sup>+</sup> cells were isolated from OT-1 mice and adoptively transferred to C57BL/6 mice. Splenic leukocytes of C57BL/6 mice were collected, viable T cells were distinguished by Zombie Aqua staining, then a CD8<sup>+</sup> TCR-Va2<sup>+</sup> cell gate was used to define adoptively transferred CD8<sup>+</sup> T cells.

**S3I, Adoptively transferred CD8<sup>+</sup> T cell cytokine production in C57BL/6 mice is altered by Trp and IDO inhibitor.** CD8<sup>+</sup> cells isolated from OT-1 mice were adoptively transferred to Trp-, VIVIT-, Indoximod-treated C57BL/6 mice. The IFN- $\gamma$ , Granzyme and Perforin levels of sorted CD8<sup>+</sup> T cells were detected by flow cytometry. n = 3, mean  $\pm$  SD.

**S3J, Adoptively transferred CD8<sup>+</sup> T cell differentiation is altered by Trp and IDO inhibitor in C57BL/6 mice.** CD8<sup>+</sup> cells isolated from OT-1 mice were adoptively transferred to Trp-, VIVIT-, Indoximod-treated C57BL/6 mice. CD8<sup>+</sup> T cells were sorted eight days after



adoptive transfer, and KLRG1 and CD127 levels were detected by flow cytometry. n = 3, mean ± SD.

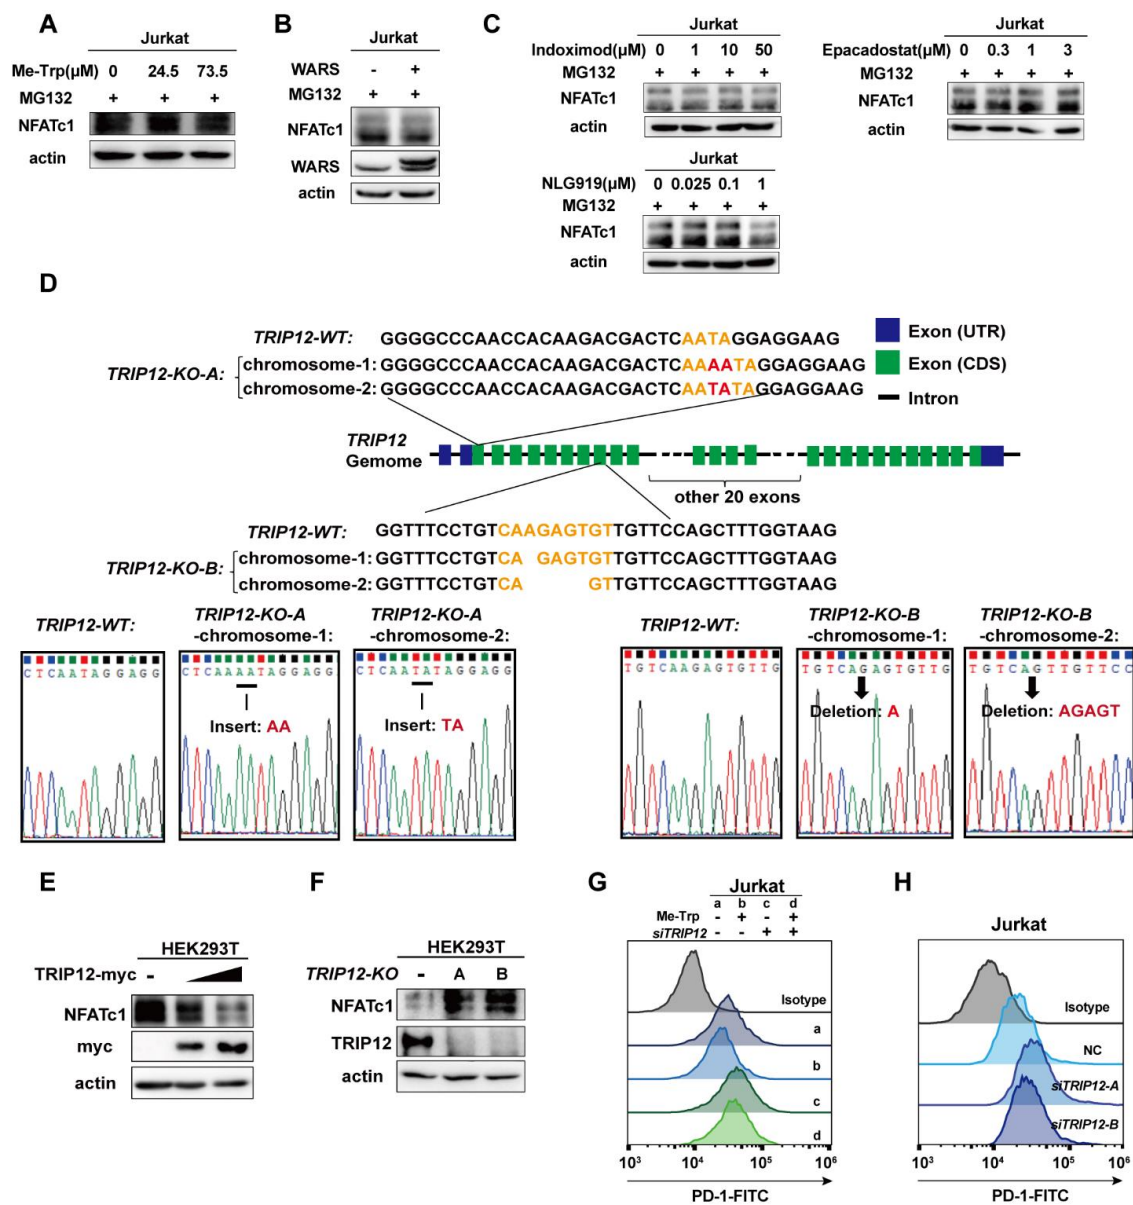

**Figure. S4.**  
*NFATc1 is subject to degradation by E3 ligase TRIP12*

S4A-S4C, Tryptophan, WARS and IDO inhibitors could not decrease NFATc1 in the present of MG132. The protein levels of NFATc1 were examined in Jurkat cells that were



treated with Me-Trp (**S4A**), WARS overexpression (**S4B**) or IDO inhibitors (indoximod, epacadostat and NLG919 analogue) (**S4C**).

**S4D, Knockout *TRIP12* in HEK293T cells.** Schematic diagram of CRISPR/Cas9-mediated knockout of *TRIP12* (*TRIP12*-KO) in HEK293T cells with two sgRNAs (upper). The success of *TRIP12* knockout was confirmed by sequencing (lower).

**S4E-S4F, *TRIP12* controlled NFATc1 protein levels.** The endogenous NFATc1 levels were detected in HEK293T cells when either *TRIP12* was overexpressed (**S4E**) or *TRIP12* was knockout (**S4F**) in HEK293T cells.

**S4G, *TRIP12* knockdown abrogated Me-Trp to decrease the cell surface PD-1.**

Representative flow cytometry results of Figure 4I.

**S4H, Silencing *TRIP12* elevated cell surface PD-1 protein.** Representative flow cytometry results of Figure 4K.

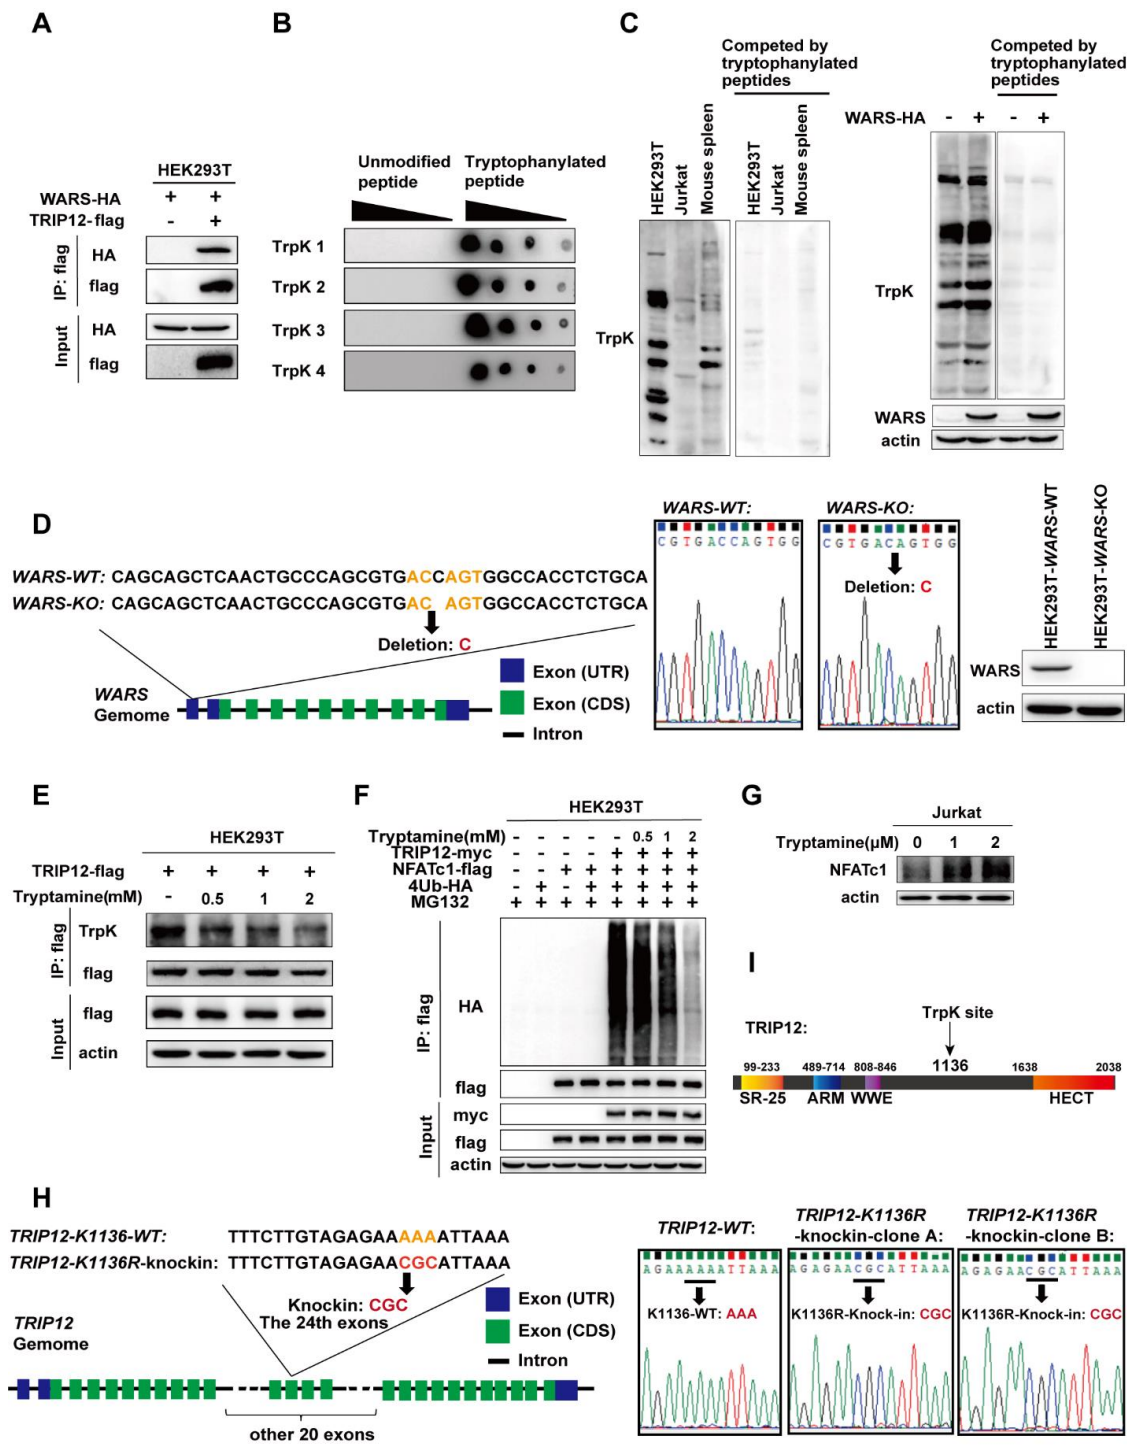

**Figure. S5.**  
*Tryptophanylation activates the E3 ligase activity of TRIP12*

**S5A, WARS interacted with TRIP12.** Flag-tagged TRIP12 was co-overexpressed with WARS-HA in HEK293T cells. Interaction between TRIP12 and WARS was assayed by co-immunoprecipitation.

**S5B-S5C, Validation of anti-tryptophanylation (TrpK) antibody.** TrpK antibodies were verified by dot blotting. Tryptophanylated peptide and the corresponding unmodified peptide were serially diluted in 1:3 series and subject to dot-blot analysis (**S5B**). To confirm the specificity of the antibody, TrpK antibodies signals of cell/tissue lysates were competed with Tryptophanylated peptide (**S5C**).

**S5D, Generation of WARS knockout.** Schematic of CRISPR/Cas9 strategy to knockout WARS in HEK293T cells (left). The success of knockout was confirmed with sequencing (right).

**S5E-S5F, WARS inhibitor tryptamine decreased TRIP12 tryptophanylation levels and NFATc1 ubiquitination.** Flag-tagged TRIP12 was overexpressed in HEK293T cells that were treated with tryptamine at doses as indicated. TRIP12 tryptophanylation levels (**S5E**) and NFATc1 ubiquitination levels (**S5F**) were detected.

**S5G, Tryptamine increased endogenous NFATc1 protein levels.** Jurkat T cells were treated with tryptamine at doses as indicated. Endogenous NFATc1 levels were detected.

**S5H, Constructing TRIP12<sup>K1136R</sup> knockin HEK293T cells.** Schematic of CRISPR/Cas9 strategy (left) and the sequencing verification of success of the construction (right) were shown (clone A and clone B were constructed from different sgRNAs).

**S5I, K1136 is located between WWE and HECT domain.** The position of tryptophanylation site K1136 in TRIP12 is shown.

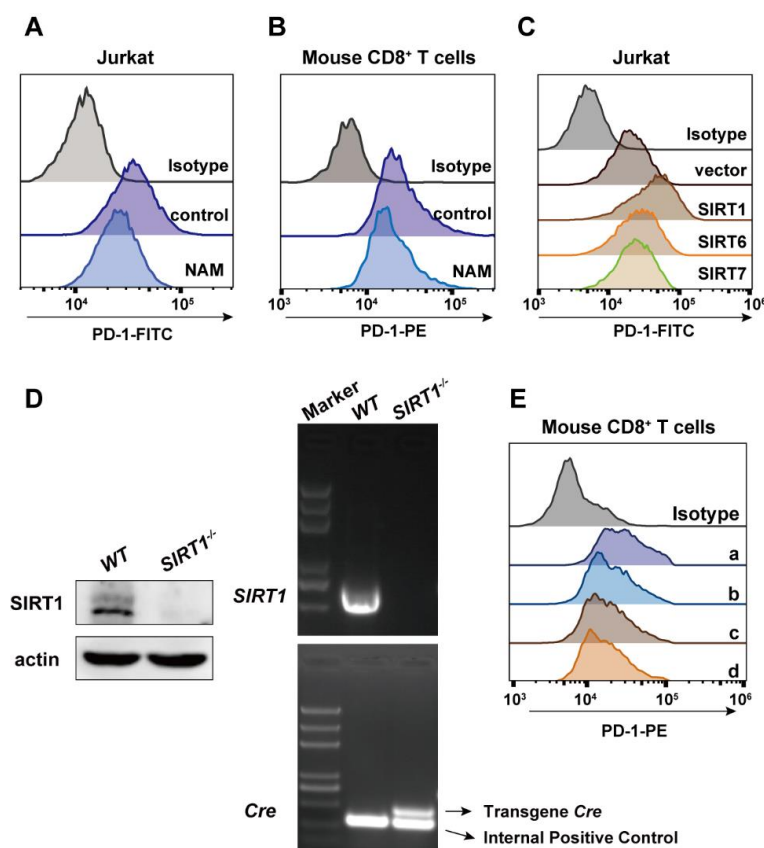

**Figure. S6.**

***SIRT1 decreases TRIP12 tryptophanylation***

**S6A-S6B, NAM decreased cell surface PD-1 in Jurkat and mouse CD8<sup>+</sup> T cells.**

Representative flow cytometry results of Figure 6a (S6A), Figure 6c (S6B).

**S6C, SIRT1 increased cell surface PD-1 expression.** Representative flow cytometry results of Figure 6F.

**S6D, Validation of *SIRT1*<sup>-/-</sup> knockout in mice.** The absence of SIRT1 in *SIRT1*<sup>-/-</sup> knockout mice was confirmed by both western blot for protein (left) and PCR for gene (right).

**S6E, *SIRT1* ablation in mice prevented NAM to decrease surface PD-1 expression.**

Representative flow cytometry results of Figure 6G.

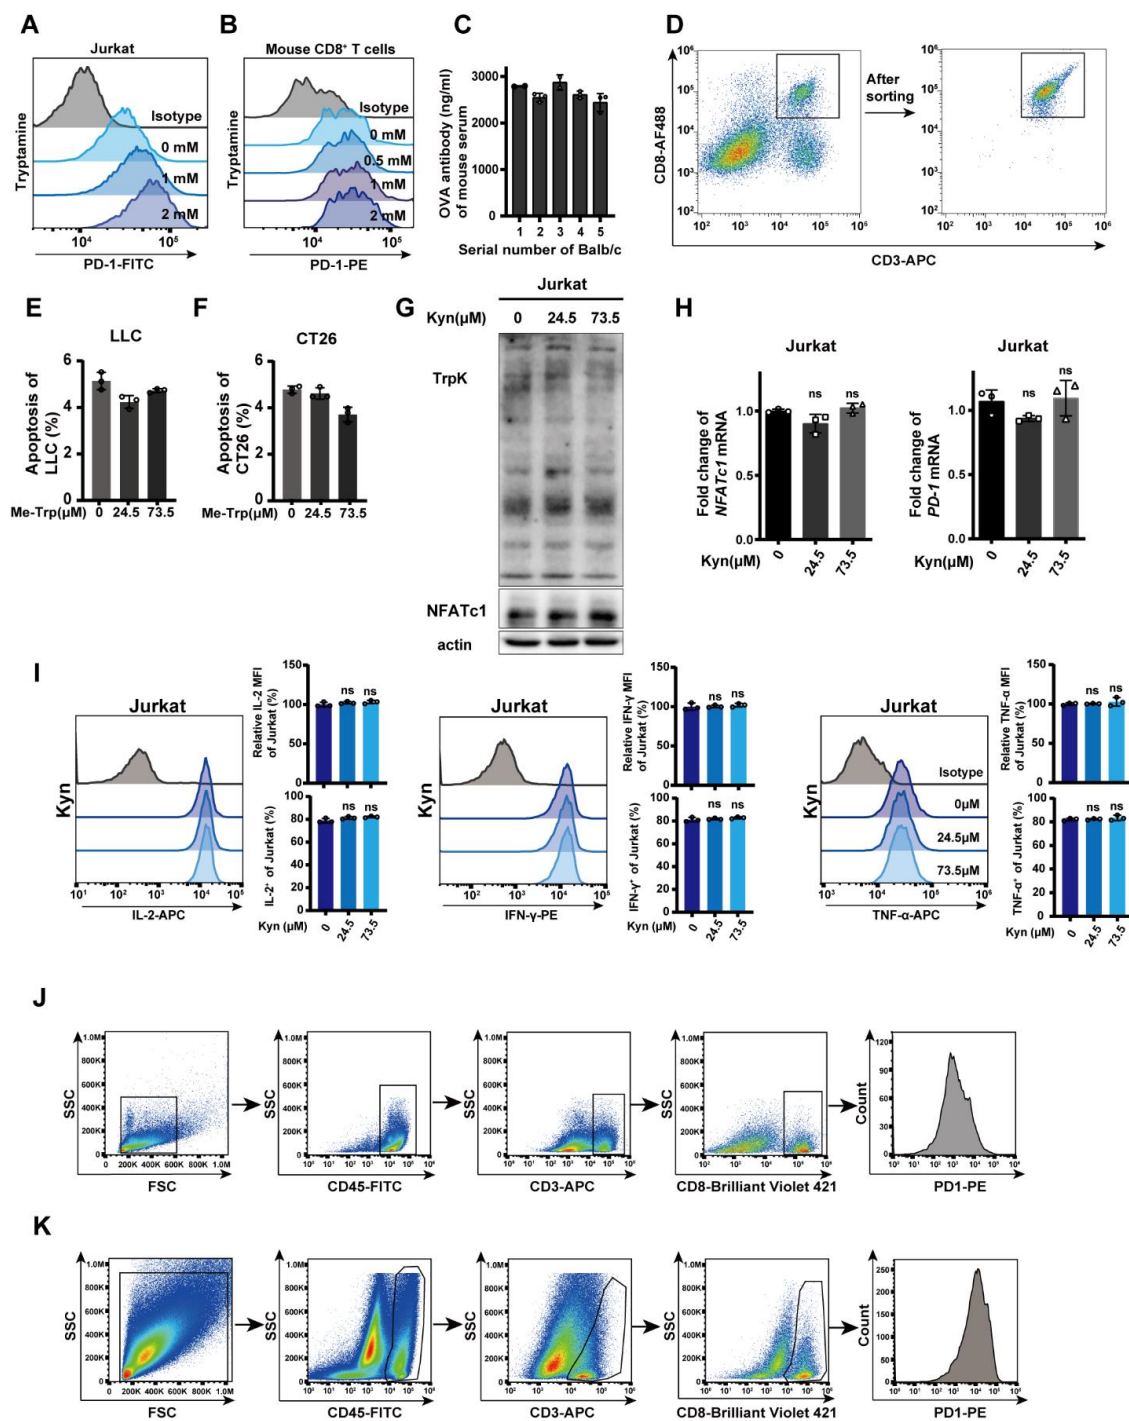

Figure. S7.

*Increased tryptophan potentiates T cells to eliminate cancer cells.*

**S7A, Tryptamine increased cell surface PD-1 in Jurkat cells.** Representative flow cytometry results of Figure 7A.

**S7B, Tryptamine increased cell surface PD-1 in mouse CD8<sup>+</sup> T cells.** Representative flow cytometry results of Figure 7C.

**S7C, The concentration of OVA antibodies in serum of OVA-immuned BALB/c mice.**

Orbital blood from OVA-immuned BALB/c mice was collected, the concentrations of OVA antibodies were obtained by ELISA.

**S7D, Sorting CD8<sup>+</sup> T cells from OVA immuned BALB/c splenocytes.** Splenic leukocytes were distinguished by CD3<sup>+</sup> and CD8<sup>+</sup> cell gates to define CD8<sup>+</sup> T cells.

**S7E-S7F, Tryptophan had negligible effect on the apoptotic rate of LLC and CT26 cells.**

Percentages of apoptosis of LLC or CT26 cells were analyzed for LLC (**S7E**) or CT26 (**S7F**) cells when they were cultured under Me-Trp levels as indicated. n = 3, mean ± SD.

**S7G, Kynurenine didn't affect tryptophanylation and NFATc1 levels in Jurkat T cells.**

Jurkat T cells were cultured in media supplemented with indicated levels of kynurenine. Global tryptophanylation levels and NFATc1 levels were detected.

**S7H, Kynurenine didn't affect NFATc1 and PD-1 mRNA levels in Jurkat T cells.** The

NFATc1 and PD-1 mRNA levels of anti-CD3 and anti-CD28 antibodies co-stimulated Jurkat T cells were detected with RT-qPCR when the cells were treated with different levels of kynurenine. n = 3, mean ± SD.

**S7I, Kynurenine didn't affect IL-2, IFN- $\gamma$  and TNF- $\alpha$  level in Jurkat T cells.** The IL-2, IFN- $\gamma$  and TNF- $\alpha$  levels were detected in stimulated Jurkat T cells, kynurenine-treated Jurkat T cells by flow cytometry. n = 3, mean ± SD.

**S7J-S7K, Sorting CD8<sup>+</sup> T cells from tumor-bearing mice.** Splenic leukocytes (**S7J**) and tumor-infiltrating lymphocytes (**S7K**) were first distinguished by a CD45<sup>+</sup> cell gate, then T cells were distinguished by a CD3<sup>+</sup> cell gate, then a CD8<sup>+</sup> cell gate was used to define CD8<sup>+</sup> T cells.



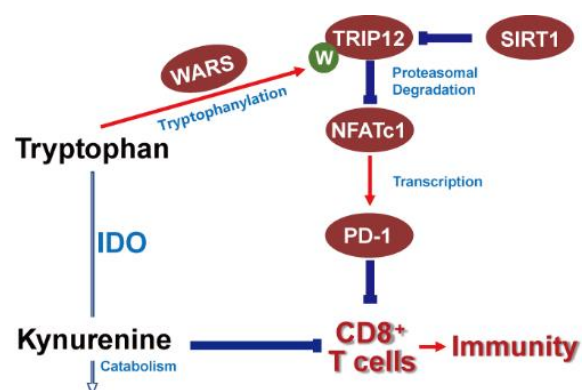

**Figure. S8.**

*Both tryptophan and its catabolites are regulators of immunity*

**S8**, A diagram that illustrates how tryptophan and tryptophan catabolites regulate immunity is shown.
